# Supplementary material for: Differential Expression of Lonp1 Isoforms in Cancer Cells
Source: MDPI journal article supplement (doi:10.3390/cells11233940), 2022-12-06
Supplement: s1 [file s1]

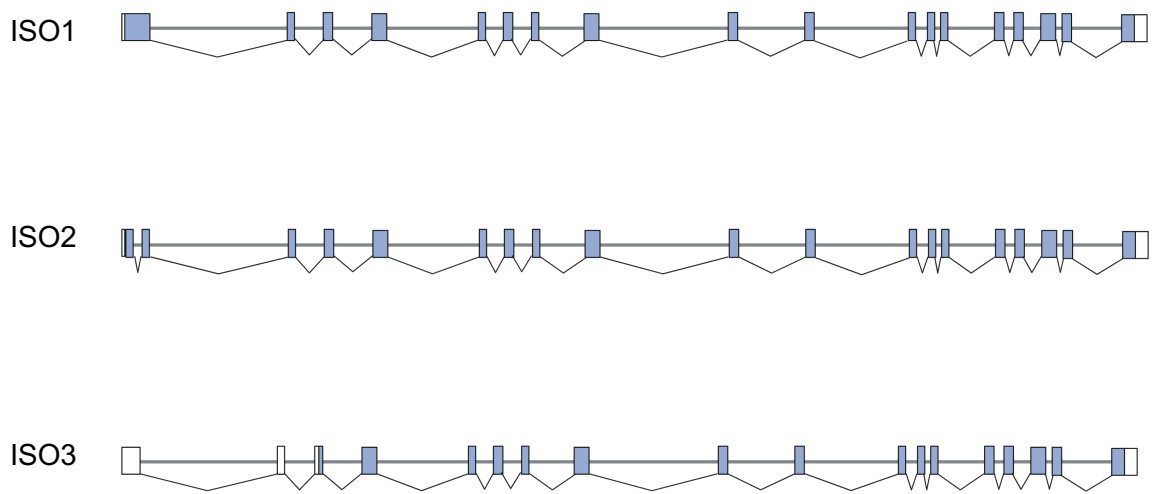

**Supplementary Figure S1.** Exon/intron organization of Lonp1 gene. The exons included in the ISO1, ISO2 and ISO3 mRNAs are shown in light blue, while the exons excluded are shown in white.

# Rectum adenocarcinoma

## ISO1

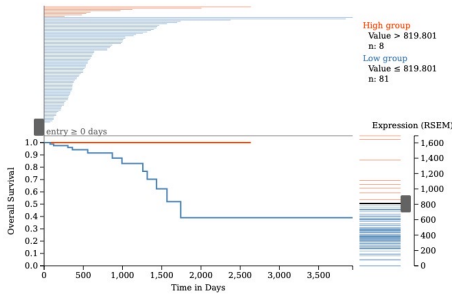

## ISO2

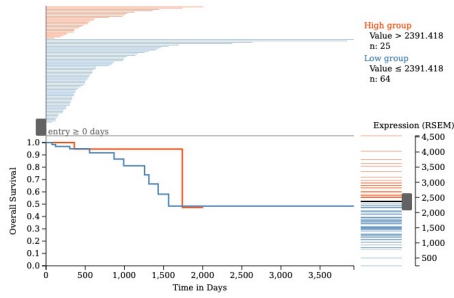

## ISO3

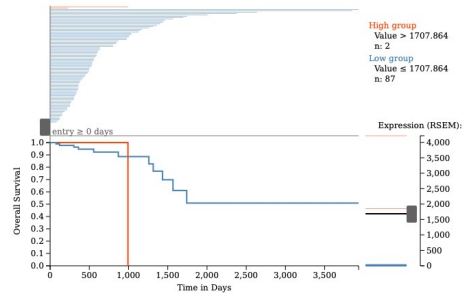

# Colon adenocarcinoma

## ISO1

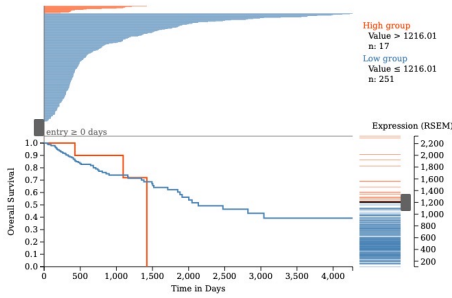

## ISO2

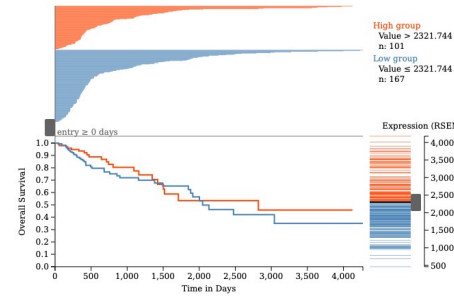

## ISO3

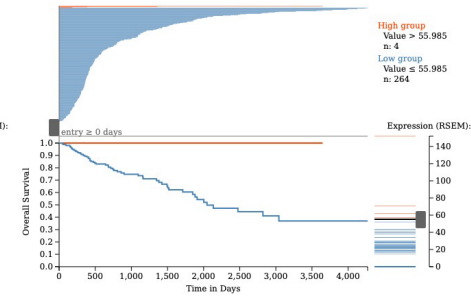

# Lung adenocarcinoma

## ISO1

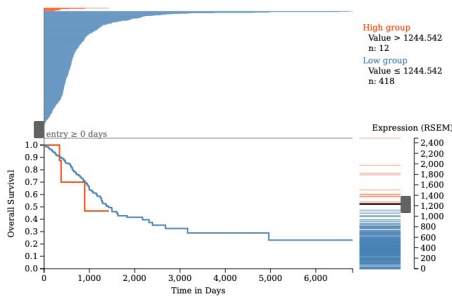

## ISO2

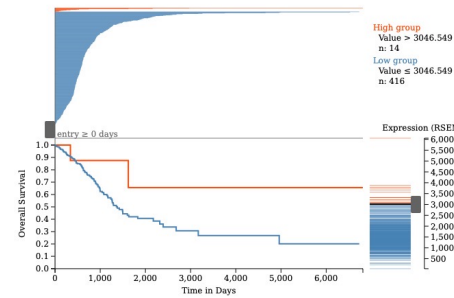

## ISO3

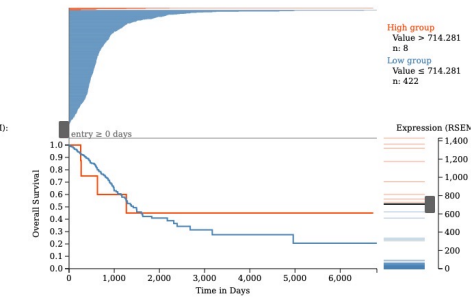

# Lung squamous cell carcinoma

## ISO1

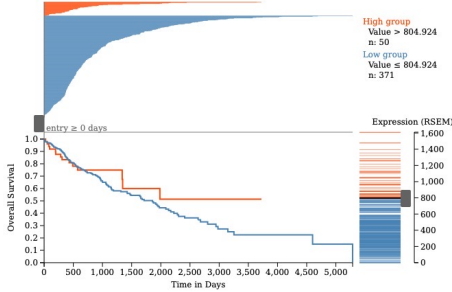

## ISO2

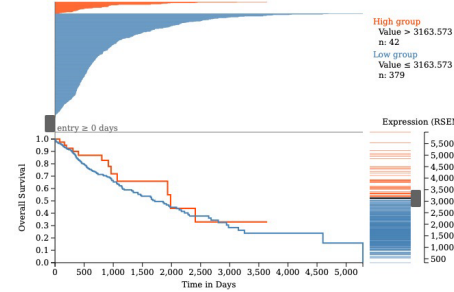

## ISO3

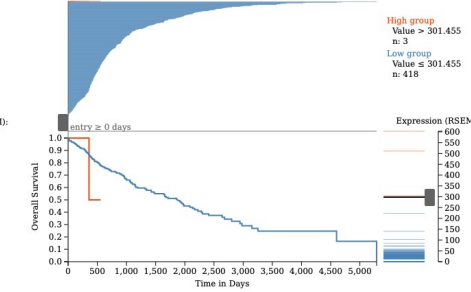

# Cervical squamous cell carcinoma and endocervical adenocarcinoma

## ISO1

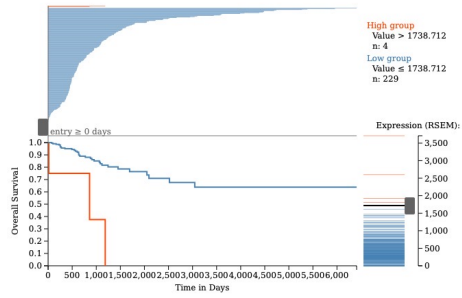

## ISO2

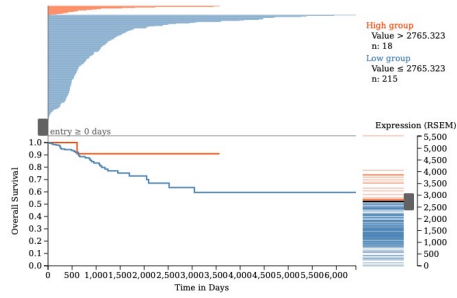

## ISO3

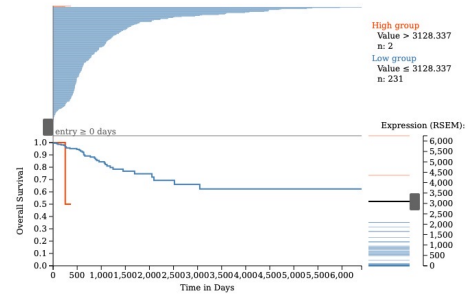

# Bladder urothelial carcinoma

## ISO1

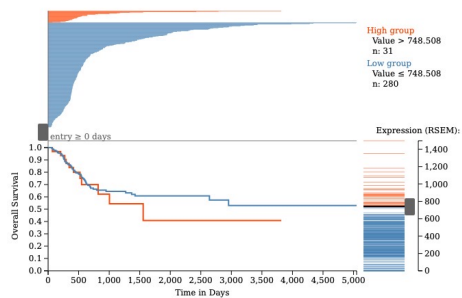

## ISO2

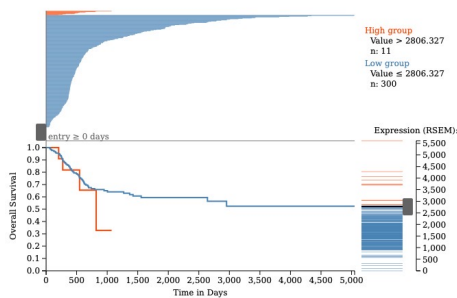

## ISO3

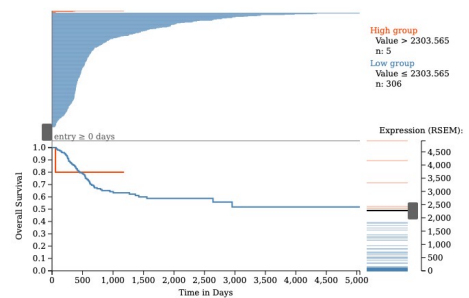

# Prostate adenocarcinoma

## ISO1

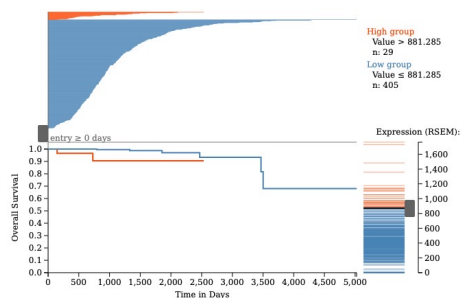

## ISO2

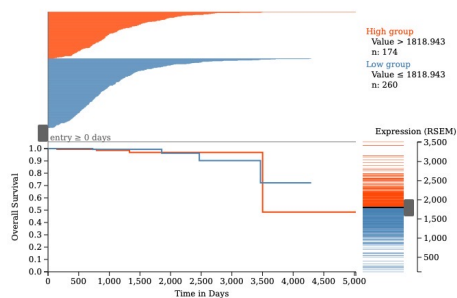

## ISO3

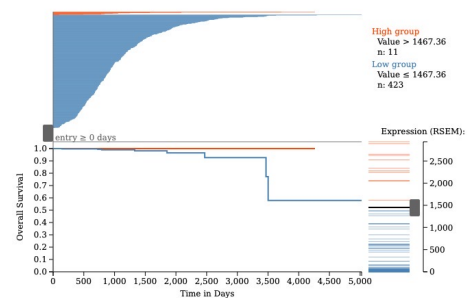

# Breast invasive carcinoma

## ISO1

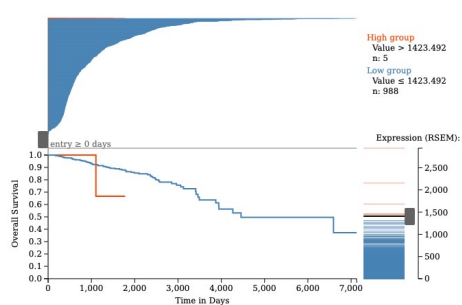

## ISO2

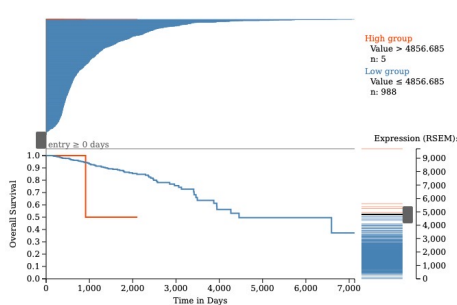

## ISO3

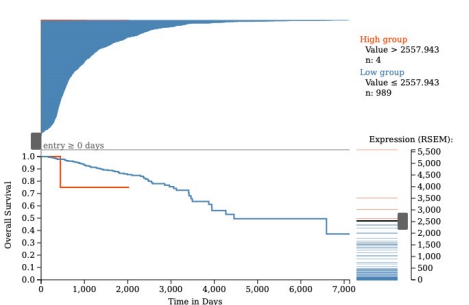

# Head and neck squamous cell carcinoma

## ISO1

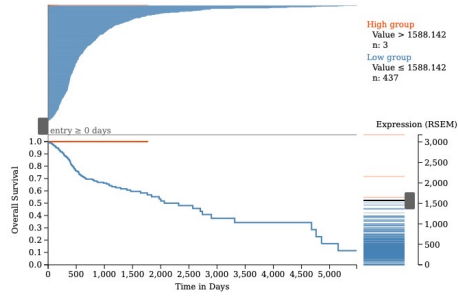

## ISO2

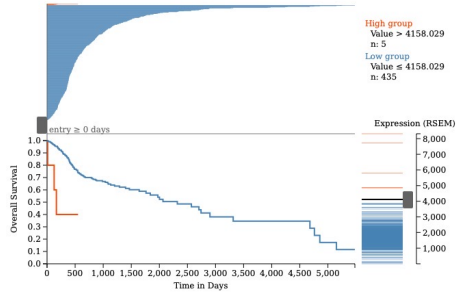

## ISO3

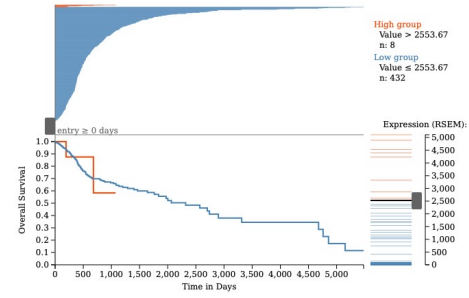

# Kidney renal clear cell carcinoma

## ISO1

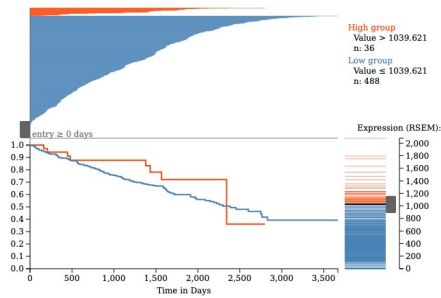

## ISO2

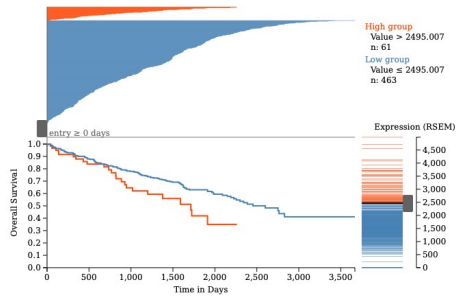

## ISO3

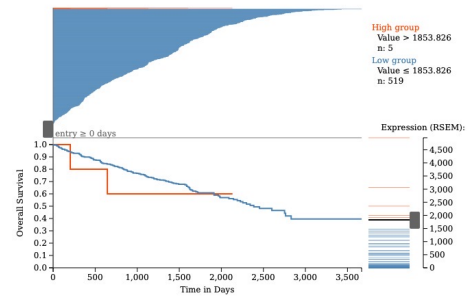

# Kidney renal papillary cell carcinoma

## ISO1

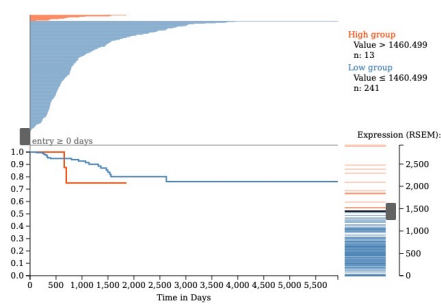

## ISO2

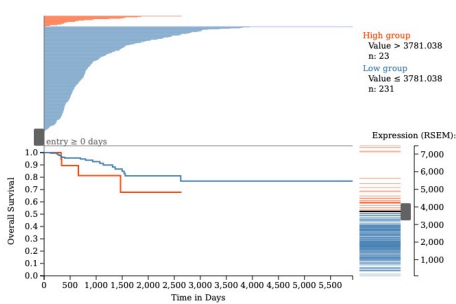

## ISO3

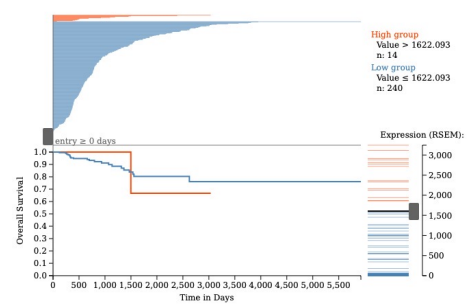

**Supplementary Figure S2.** Kaplan-Meier overall survival curves of patients stratified on the expression of Lonp1 isoform-1, isoform-2, and isoform-3 in different primary solid tumours.

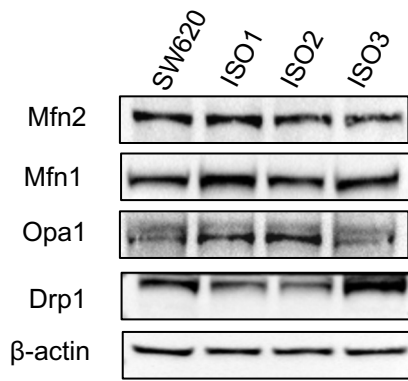

**Supplementary Figure S3. Effects of Lonp1 isoform-1, isoform-2, and isoform-3 overexpression on mitochondrial dynamics.**

Representative immunoblots showing Mfn2, Mfn1, Opa1, and Drp1 expression in SW620 and cells overexpressing Lonp1 isoform-1, isoform-2, and isoform-3.
